## Differential vulnerability of the cerebellum in healthy ageing and Alzheimer's disease

Helena M. Gellersen<sup>1</sup>, Xavier Guell<sup>2</sup>, Saber Sami<sup>3</sup>

<sup>1</sup>Behavioural and Clinical Neuroscience Institute (BCNI), Department of Psychology, University of Cambridge, Cambridge, UK; [hg424@cam.ac.uk](mailto:hg424@cam.ac.uk)

<sup>2</sup>Massachusetts Institute of Technology, Massachusetts General Hospital, and Harvard Medical School, USA; [xaviergp@mit.edu](mailto:xaviergp@mit.edu)

<sup>3</sup>Norwich Medical School, Faculty of Medicine and Health Sciences, University of East Anglia, Norwich Research Park, Norwich, UK; [s.sami@uea.ac.uk](mailto:s.sami@uea.ac.uk)

### Addresses:

<sup>1</sup>BCNI  
Sir William Hardy Building  
Downing Street  
Cambridge CB2 3EB  
United Kingdom

<sup>2</sup>Massachusetts Institute of Technology  
77 Massachusetts Avenue  
Cambridge, MA  
USA

<sup>3</sup>Norwich Medical School  
Norwich Research Park  
Norwich NR4 7TJ  
United Kingdom

## **Abstract**

**INTRODUCTION:** Ageing and Alzheimer's Disease (AD) result in cerebellar atrophy, but it is unclear whether atrophy engages similar or distinct structural and functional cerebellar territories. **METHODS:** We performed a meta-analysis of cerebellar grey matter loss in ageing and AD. We mapped voxels with structural decline along cerebellar functional gradients that provide a quantitative measure of functional specialisation - Gradient 1 progresses from motor to default-mode territories; Gradient 2 isolates task-positive processing areas; Gradient 3 captures lateralisation differences in cognitive regions. **RESULTS:** We identified bilateral cerebellar atrophy in default-mode, cognitive control and attention networks in ageing, and right-lateralised AD-related atrophy in similar macroscale networks. Age- and AD-related structural decline showed partial spatial overlap. Functional localisation differences between ageing and AD atrophy were observed only on Gradient 3. **DISCUSSION:** These findings provide an unprecedented characterisation of structural and functional localisation differences and similarities in cerebellar atrophy between ageing and AD.

## 1. Background

Despite the earlier notion that the cerebellum is spared in Alzheimer's disease (AD), recent studies have started to elucidate detrimental effects of AD on cerebellar structure, which in some cases correlates with clinical disease ratings [1–3]. This is in line with the current understanding that the cerebellum is involved in a range of cognitive, motor, and affective functions by virtue of segregated cerebro-cerebellar loops [4,5]. The healthy ageing process is also associated with changes in cerebellar structure, which are similar in magnitude to those observed in the prefrontal cortex and hippocampus [6–8]. These marked alterations highlight the importance of the cerebellum for our understanding of the cognitive ageing process. The early stages of AD are particularly difficult to differentiate from normal ageing effects due to the long preclinical phase during which pathological changes start to accrue undetected [9]. Therefore, it is of interest to investigate whether AD-specific pathological effects exacerbate age-related structural decline or exhibit specific patterns that are dissociable from normal ageing.

The cellular organisation of the cerebellar cortex is striking in its uniformity. However, the anterior-posterior functional continuum from motor to cognitive regions and the unique cortico-limbic connectivity patterns of each cerebellar lobule suggest non-uniformity of age and pathological effects across this brain region [10–13]. Differential subregional vulnerability to age or pathology may be due to downstream influences resulting from cerebro-cerebellar synergism [6,14]. Structural decline in the cerebellum may also have selective effects on distant neocortical regions [15]. Indeed, neuroimaging studies have revealed covariation in grey matter volume throughout neocortical and cerebellar regions [16,17]. Changes in cerebellar grey matter have significant effects on functional decline in older adults and

neurodegeneration [1,8]. Here we used coordinate-based meta-analysis to characterise the most consistent age- and AD-related changes in cerebellar grey matter [18]. This is preferable to lobular volumetry because functional boundaries of the cerebellum do not necessarily obey the parcellation into lobular subregions [13,19–21].

An important question concerns the interpretation of structural findings with respect to potential consequences on function. In most studies, this is based on the overlap between clusters of structural alterations and known atlases with discrete boundaries. Such an approach may miss subtle functional differences within a region or continuities between regions that become apparent on continuous mappings. Recently, a continuous map of the functional organisations of the cerebellar cortex has been identified [21,22]. The first functional gradient reflects a continuum from cognitive default mode to motor functions; the second isolates attentional processing; the third highlights left versus right hemispheric differences in the organisation of cognitive, but not motor functions [21]. As such, the third gradient suggests that cognitive processing in left and right hemispheres may be qualitatively different. Here we use a novel tool to map our structural imaging findings onto these functional gradients [22] and to compare the distribution of structural age- and AD-related grey matter loss with respect to their functional localisation. These functional gradients allow a continuous representation of the organisation of the cerebellar cortex which can highlight even subtle functional neuroanatomical differences between AD and ageing [22].

These investigations will further our understanding of the role that grey matter decline in the cerebellum may play in age-related functional deficits and whether these patterns of age-related grey matter loss are distinct from those in Alzheimer's disease.

## 2. Methods

Here we present a condensed version of our methods. For a more detailed description of each step see Appendix A.

### 2.1 Literature Search

We carried out a systematic literature search on Pubmed and PsycInfo using search terms related to ageing and structural neuroimaging in the title and/or abstracts of peer-reviewed records that were published until October 1<sup>st</sup> 2019 (Table 1). Inclusion criteria required 1) an analysis that compared healthy young and old subjects and 2) availability of coordinates of regions with grey matter decline.  $N=18$  studies were identified for inclusion in the meta-analysis. Input for the analysis were coordinates of age-related decreased cerebellar grey matter volume or density and the sample size of each study. Figure 1 provides an overview of the selection procedure. For further details see Appendix A (section A.1).

We also conducted an updated analysis of cerebellar grey matter decline in late-onset AD in  $n=13$  studies based on our previous research [1] and newly identified studies. For a list of participants, imaging parameters and cerebellar coordinates in all included studies see Appendix B (Tables B1, B2).

### 2.2 Meta-Analysis

The coordinate-based random-effects meta-analyses on age and AD were carried out using anatomical likelihood estimation (ALE) using version 2.3.6 of GingerALE (<http://brainmap.org>) [18,23,24]. Details of this method are listed in Appendix A (section A.2). Briefly, the method searches for regions of convergence between coordinates of the input studies, modelled as Gaussian probability distributions around the centre coordinate to obtain one combined ALE image. We chose a cluster-level thresholding method. This method simulates random data sets

across 1000 permutations with the same characteristics of the original data set used to create the original ALE image. The probability threshold for the clusters in the simulated data was set to  $p < .05$  for a cluster-level family-wise error correction. The cluster-forming threshold was chosen to be  $p < .001$  (uncorrected), which is one of the two recommended thresholds [25].

It is important to note that a region of interest (ROI) based meta-analysis does not provide information about the likelihood or prevalence of cerebellar atrophy in older adults and AD but rather characterises the pattern of lobular grey matter loss in cases where cerebellar atrophy is indeed present.

### *2.3 Visualisation of results*

Results were visualised using flatmaps created with the SUI toolbox [19,26,27] and were plotted next to a flatmap of the network connectivity patterns derived from Buckner and colleagues [13] for side by side comparison (details in Appendix A, section A.3).

### *2.4 Conjunction image*

To demonstrate the convergence between AD and ageing analyses, we created a conjunction in GingerALE based on the voxelwise minimum between the two thresholded ALE images derived from the AD and the ageing analyses [18,28] (details in Appendix A, section A.4).

### *2.5 Gradient-based analysis of meta-analytic findings*

To aid the topographical interpretation of our meta-analytic findings, we used a recently developed tool called LittleBrain [22]. LittleBrain maps the voxels identified in our structural analysis onto functional gradients that capture low-dimensional properties of cerebellar functional organization [21]. For details of this

method see Appendix A (section A.5). Cerebellar Gradient 1 represents the principal functional axis of the cerebellum, including motor representations on one extreme (lobules IV-VI and VIII) and transmodal cognitive processing such as cerebellar default mode network regions on the other (Crus I/II and lobule IX). Gradient 2 isolates attentional processes moving along a task-focused to task-unfocused functional axis [21]. One end of this gradient includes anterior regions Crus I/II involved in the frontoparietal and attention networks, while the other end includes motor (lobules I-IV) and DMN regions (posterior Crus I/II). We also chose to include Gradient 3 in our investigations because it reflects differences in lateralisation of non-motor functions.

Due to non-normality of gradient value distributions (Shapiro-Wilk tests,  $p < .001$ ) differences between the AD and ageing gradient values were tested using permutation testing of differences in rank sums. We further computed the non-parametric effect size Cohen's  $U_1$ , which measures the extent of overlap between two non-normal distributions [29].

### *2.6 Robustness tests: jackknife procedure*

Robustness of our results for the ageing and AD analyses to the removal of any single study was tested using a jackknife procedure, in which the meta-analysis was carried out without a given study (Appendix A, section A.6). We further tested whether the difference in the distribution of AD gradient values and the jackknife analysis gradient values remained robust to the removal of any one study.

### 3. Results

#### 3.1 Healthy ageing meta-analysis

The ageing analysis involved 18 studies with 64 coordinates of cerebellar grey matter atrophy across 2441 subjects (Appendix B, Table B1 for details of included studies). Five clusters of reduced grey matter volume were identified (Figure 2a, Table 2; all local peaks  $p < .020$ ). Cluster 1 was situated in right Crus II. Cluster 2 encompassed parts of right Crus I and lobule VI. Cluster 3 was in left Crus II. The fourth cluster of grey matter volume reduction was in vermal lobule VI, encroaching upon left hemispheric lobule VI. The fifth cluster was located in lateral left posterior hemisphere with peaks in Crus II and Crus I, with some extension into lobules VIIb and VIII.

#### 3.2 Alzheimer's disease meta-analysis

The final dataset for the AD analysis comprised  $n=13$  studies in 528 patients and controls with  $k=34$  foci of cerebellar grey matter loss relative to controls. Study characteristics for the included studies can be found in Appendix B (Table B2). The meta-analysis revealed one large AD-related cluster of grey matter loss in the right posterior hemisphere (Figure 2b; Table 2; all  $p < .020$ ). This cluster comprised one regional peak in lobule VI and three in Crus I with extension to Crus II. The inclusion of the additional studies in this analysis compared to our previous results increased the extent but not the peak location of this cluster [1].

#### 3.3 Conjunction between ageing and Alzheimer's disease

The conjunction image generated by GingerALE to compare the AD and ageing results demonstrated that there was one region of overlap between these two groups ( $p=.013$ ; Figure 2c; Table 2). This was a cluster in right Crus I/lobule VI that had emerged in both analyses.



### *3.4 Placing our meta-analytic structural results in context with functional gradients and networks of the cerebellum*

For plots comparing distributions of gradient values for each single gradient between age, AD and the AD-age overlap see Figure 3. Figure 4 shows the distribution of gradient values colour-coded by functional brain network (a.-c.) and flatmaps of gradient distributions with AD- and age-related atrophy clusters superimposed (e.-g.).

A comparison of the clusters of age-related grey matter reduction from our meta-analysis with the network connectivity patterns derived from Buckner and colleagues [13] showed that the majority of age-related structural decline occurred in regions belonging to the frontoparietal and default mode networks (DMN), with some involvement of ventral and dorsal attention networks (Figure 4). The voxels in the age-related grey matter loss clusters were involved in cognitive processing (tendency towards higher Gradient 1 values,  $M=2.833$ ,  $SD=3.630$ ; Figures 3a/4a) and encompassed both task-focused and task-unfocused domains (Gradient 2 mean value close to zero,  $M=.055$ ,  $SD=1.193$ ; Figures 3b/4b). Gradient 3 values for ageing included both minimum and maximum values, reflecting the distribution of age effects across the two hemispheres in cognitive territories of the cerebellar cortex ( $M=-.144$ ,  $SD=.652$ ; Figures 3c/4c).

The regions affected by AD also participate in DMN and the frontoparietal network. Higher Gradient 1 values highlight the involvement of cerebellar cognitive regions in this disease ( $M=3.398$ ,  $SD=2.415$ ), while motor regions are spared (although see jackknife analysis of Möller et al. [30], Appendix D). The range of Gradient 2 values implicates both task-focused and unfocused processing regions in

AD ( $M=.220$   $SD=.933$ ). Gradient 3 values for AD were negative, reflecting right lateralisation of grey matter decline ( $M=-.600$ ,  $SD=.231$ ).

The ageing-AD conjunction voxels were located in regions that exhibit greater involvement in task-focused cognitive processes (high Gradient 2 values;  $M=.995$ ,  $SD=1.193$ ; Figure 4c). While grey matter loss in both AD and ageing involved DMN regions, all conjunction voxels overlapped with areas previously identified as belonging to the frontoparietal network [13].

The distributions of gradient 1 and 2 values in healthy ageing and AD were highly overlapping (Gradient 1:  $Z=.394$ ,  $p=.686$ ; Cohen's  $U_I=.202$ ; Gradient 2:  $Z=1.110$ ,  $p=.265$ ; Cohen's  $U_I=.084$ ; Figure 4a). In contrast, regional grey matter loss due to healthy ageing was associated with higher median Gradient 3 values compared to AD-related structural decline ( $Z=-10.486$ ,  $p<.001$ ; Cohen's  $U_I=.347$ ), reflecting the involvement of only the right (AD) as opposed to left and right (ageing) cerebellar hemispheres in each group. For visualisation of the permutation results of the leave-one-out analyses refer to Appendix C, Figure C1).

### *3.5 Robustness tests: jackknife analyses*

The detailed results of each jackknife procedure are reported in Appendix D. For both the AD and ageing jackknife analyses there was no case in which removing one study from the analysis changed the label of the peak voxel of a cluster (Appendix D, Tables D1 and D2). Only slight shifts in peak voxel locations were observed. The jackknife procedure showed that healthy ageing clusters 1 and 2 in right Crus I/II were robust to the removal of any one study. Only unsubstantial changes in size and extent of these clusters occurred. Clusters 3 and 4 survived removal of all except one study each and remained stable in all other instances, indicating robustness in 94% of analyses. Cluster 5 in anterior Crus I/II remained

stable in 83% of all analyses but did not survive correction for multiple comparisons upon removal of studies with a larger number of foci.

For the AD jackknife analyses, the main cluster remained present in all jackknife analyses but the cluster size was reduced in five cases, which tended to be when studies with larger sample sizes were removed (see Appendix D for details and for the special case of removal of Möller et al. [30] leading to an additional atrophy cluster in the left anterior cerebellar lobe. Here we focus on regions that were consistently identified as affected by AD).

## **4. Discussion**

### *4.1 General Discussion*

In this meta-analysis, we employed anatomical likelihood estimation to identify consistent patterns of cerebellar grey matter atrophy across 18 studies of healthy ageing. We further compared age-related decline to that observed in 13 studies of Alzheimer's disease. Age and AD exhibited grey matter decline in posterior cerebellum in Crus I/II and lobule VI. The most striking finding was the strict right lateralisation of grey matter loss in AD compared to bilateral decline in healthy ageing.

We then mapped regions of grey matter atrophy onto major gradients that govern cerebellar functional organisation. Using these gradients in combination with structural findings allowed a more nuanced characterisation of the functional profile of vulnerable cerebellar regions. The distributions of Gradients 1 and 2 were highly overlapping, supporting similarities of AD and age effects in terms of two out of the three functional axes of the cerebellum. Cerebellar regions affected by AD or age

exhibit a strong bias towards cognitive as opposed to motor processing (Gradient 1). Atrophied regions were similarly involved across the task-focused to unfocused continuum (Gradient 2).

Gradient 3 values were significantly different between atrophied regions in AD and healthy ageing, reflecting the lateralisation effect shown in the ALE analysis. Gradient 3 highlights differences in cognitive processing in the two hemispheres, which are not present in motor functions. Note that the interpretation of Gradient 3 values does not simply pertain to spatial localisation of a cluster to the left or right hemisphere. In fact, Gradient 3 reflects higher functional lateralisation of cognitive functions as opposed to primary motor functions. The same regions in left and right homologues of the motor cerebellum (lobules IV-VIII) would be described with the same gradient values. However, left and right hemispheric areas of nonmotor processing (lobules Crus I/II, VIIb, IX) lie on two opposing ends of the spectrum [21]. These findings suggest a dissociation between the functional connectivity fingerprint of left and right posterior cerebellar lobules and highlight their differential vulnerability to AD and age.

In summary, structural and gradient analyses combined paint a picture of divergent and convergent patterns of cerebellar vulnerability to age and AD. The pattern of structural atrophy was mainly non-overlapping. Affected regions did belong to the same lobules, however. They participated in the same large-scale discrete functional networks (DMN, frontoparietal, attention) [13] and were located in similar positions along two major functional gradients. Despite these similarities, differences along Gradient 3 allowed for the observation of age-AD divergence along alternative dimensions of cerebellar functional hierarchies.

#### *4.2 Prior evidence of macroscale cerebellar changes in healthy ageing and Alzheimer's disease*

In posterior cerebellar regions, grey matter volume has been associated with a variety of cognitive functions in healthy older adults, many of which co-localise with regions in our meta-analysis [8]. Positive associations between grey matter volume and long-term memory performance have been found for total cerebellar volume and lobules VI and Crus II [3,11,31,32], while greater scores on tasks involving executive function and processing speed are correlated with greater volumes in lobule VI and Crus I [33,34]. A recent meta-analysis has shown underactivation in the ageing cerebellum to be a common finding compared to younger brains [35]. Future studies might examine whether decreases in grey matter in these regions identified here are driving such changes in BOLD activation.

Growing evidence highlights vulnerability of the cerebellum due to amyloid toxicity [36]. Accordingly, higher amyloid burden in healthy older adults is associated with grey matter loss across DMN regions, including cerebellum [37]. Cerebellar atrophy has been found in both sporadic and early-onset AD [2,38]. This atrophy may contribute to the altered connectivity between hippocampus, cerebral, and cerebellar DMN regions already seen in early AD, individuals with mild cognitive impairment (MCI) and even healthy older adults with subjective memory complaints [3,39–41]. Similarly, the strongest genetic risk factor for AD (epsilon-4 of the apolipoprotein gene) has been shown to affect cerebellar communication with corticolimbic regions during memory tasks in young e4-carriers [42]. These effects in young e4-carriers bore a striking resemblance with the cluster in right Crus I/lobule VI that we identified here.

Our functional gradient visualisation showed that grey matter loss also occurred in regions of Crus I/lobule VI which are associated with the frontoparietal network [13,21]. Structural decline in these regions may contribute to impairment in cognitive control of memory retrieval and other executive functions, including processing speed and working memory that are also a feature of AD [43,44].

#### *4.5 Limitations and future directions*

Previous studies have suggested that not only posterior but also anterior lobes of the cerebellum are susceptible to ageing [10,45,46]. Lobules I-V did not emerge in this meta-analysis. However, some studies assessed in our literature search did not include coordinates of grey matter loss and could not be included. Our analysis therefore likely underestimates the extent of grey matter reductions in the cerebellum in healthy ageing. Replication based on data from single subjects is an important next step.

As discussed above, prior studies and our findings converged to point to right regions of lobule VI and Crus I/II as particularly vulnerable to age, AD genetic risk and actual AD cases. AD may exacerbate the downward trajectory of this region already observed in healthy ageing shown here. Alternatively, the studies that found significant age-related grey matter loss in these regions may point out early declines that will later manifest as AD. We cannot test this possibility given the lack of longitudinal data in our analysis.

It is not clear to what extent cerebellar structural decline has clinical relevance for behavioural deficits in AD patients. Cerebellar deficits alone may not be sufficient to result in scores below the cut-off point for normal functioning in standard AD screenings because they are masked by the large number of test items that are

insensitive to the deficits that cerebellar structural decline may cause [44]. It is possible that correlations between cerebellar grey matter and affective-cognitive functioning in AD may be detected with a more sensitive tool geared towards cerebellar deficits, such as the novel Cerebellar Cognitive Affective/Schmahmann Syndrome Scale [44]. This is an interesting avenue for future research.

Finally, our findings may be of relevance for studies aiming to determine optimal targets for neuromodulatory therapeutic approaches. Non-invasive modulation of cerebellar regions has been shown to have network- and task-specific effects on connected neocortical regions [47,48]. Targeting cerebellar regions that are part of cortico-limbic networks most affected by AD through augmentative neuromodulation may bolster long-range connectivity.

#### *4.6 Conclusions*

Our analyses highlight vulnerability of posterior cerebellum to both AD and ageing (Crus I/II, lobule VI). The right lateralisation of AD atrophy compared to bilateral effects in healthy ageing was particularly striking. Spatial overlap between grey matter loss in both groups was relatively small. Nonetheless, regions of age- and AD-related structural decline were situated in similar positions along the two principal axes of cerebellar functional neuroanatomy (cognitive vs. motor and degree of task focus). In contrast, the functional profile of regions with age- and AD-related atrophy differed in terms of the tertiary gradient (lateralisation in cognitive territories). These findings show subtler differences in the functional fingerprint of regions impacted by AD and ageing that standard discrete parcellations of brain networks were not able to uncover. The lateralisation differences in cognitive domains suggests potentially different processing of the two cerebellar hemispheres in

cognitive tasks [21]. These findings provide an unprecedented characterisation of structural and functional localisation differences and similarities in cerebellar atrophy between ageing and AD. More research is needed to better understand 1) the nature of these lateralisation differences in cognitive processing, 2) how age and pathology impact cerebellar computational processes, 3) how cerebellar interactions with other brain regions may influence cognitive decline or compensation in healthy ageing and AD, and 4) the role of cerebellar grey matter loss in the neuropsychology of AD.



## References

- [1] Gellersen HM, Guo CC, O'Callaghan C, Tan RH, Sami S, Hornberger M. Cerebellar atrophy in neurodegeneration - a meta-analysis. *J Neurol Neurosurg Psychiatry* 2017;88. doi:10.1136/jnnp-2017-315607.
- [2] Guo CC, Tan R, Hodges JR, Hu X, Sami S, Hornberger M. Network-selective vulnerability of the human cerebellum to Alzheimer's disease and frontotemporal dementia. *Brain* 2016;139:1527–38. doi:10.1093/brain/aww003.
- [3] Serra L, Bruschini M, Di Domenico C, Gabrielli GB, Marra C, Caltagirone C, et al. Memory is Not Enough: The Neurobiological Substrates of Dynamic Cognitive Reserve. *J Alzheimer's Dis* 2017;58:171–84. doi:10.3233/JAD-170086.
- [4] Kelly RM, Strick PL. Cerebellar loops with motor cortex and prefrontal cortex of a nonhuman primate. *J Neurosci* 2003;23:8432–44.
- [5] Schmahmann JD, Guell X, Stoodley CJ, Halko MA. The Theory and Neuroscience of Cerebellar Cognition. *Annu Rev Neurosci* 2019;42:337–64. doi:10.1146/annurev-neuro-070918-050258.
- [6] Raz N, Rodrigue KM. Differential aging of the brain: Patterns, cognitive correlates and modifiers. *Neurosci Biobehav Rev* 2006;30:730–48. doi:10.1016/j.neubiorev.2006.07.001.
- [7] Jernigan TL, Archibald SL, Fennema-Notestine C, Gamst AC, Stout JC, Bonner J, et al. Effects of age on tissues and regions of the cerebrum and cerebellum. *Neurobiol Aging* 2001;22:581–94. doi:10.1016/S0197-4580(01)00217-2.
- [8] Bernard JA, Seidler RD. Moving forward: Age effects on the cerebellum underlie cognitive and motor declines. *Neurosci Biobehav Rev* 2014;42:193–207. doi:10.1016/j.neubiorev.2014.02.011.
- [9] Jack CR, Knopman DS, Jagust WJ, Shaw LM, Aisen PS, Weiner MW, et al. Hypothetical model of dynamic biomarkers of the Alzheimer's pathological cascade. *Lancet Neurol* 2010;9:119–28. doi:10.1016/S1474-4422(09)70299-6.
- [10] Bernard JA, Leopold DR, Calhoun VD, Mittal VA. Regional Cerebellar Volume and Cognitive Function From Adolescence to Late Middle Age. *Hum Brain Mapp* 2015;36:1102–20. doi:10.1002/hbm.22690.Regional.
- [11] Koppelmans V, Hoogendam YY, Hirsiger S, Mérillat S, Jäncke L, Seidler RD. Regional cerebellar volumetric correlates of manual motor and cognitive function. *Brain Struct Funct* 2017;222:1929–44. doi:10.1007/s00429-016-1317-7.
- [12] Ramanoël S, Hoyau E, Kauffmann L, Renard F, Pichat C, Boudiaf N, et al. Gray matter volume and cognitive performance during normal aging A voxel-based morphometry study. *Front Aging Neurosci* 2018;10:1–10. doi:10.3389/fnagi.2018.00235.
- [13] Buckner RL, Krienen FM, Castellanos A, Diaz JC, Yeo BTT. The organization of the human cerebellum estimated by intrinsic functional connectivity. *J Neurophysiol* 2011;106:2322–45. doi:10.1152/jn.00339.2011.
- [14] Sullivan E V., Pfefferbaum A. Diffusion tensor imaging and aging. *Neurosci Biobehav Rev* 2006;30:749–61. doi:10.1016/j.neubiorev.2006.06.002.
- [15] Limperopoulos C, Chilingaryan G, Guizard N, Robertson RL, Du Plessis AJ. Cerebellar injury in the premature infant is associated with impaired growth of specific cerebral regions. *Pediatr Res* 2010;68:145–50.

- doi:10.1203/PDR.0b013e3181e1d032.
- [16] Hogan MJ, Staff RT, Bunting BP, Murray AD, Ahearn TS, Deary IJ, et al. Cerebellar brain volume accounts for variance in cognitive performance in older adults. *Cortex* 2011;47:441–50. doi:10.1016/j.cortex.2010.01.001.
  - [17] Guo CC, Tan R, Hodges JR, Hu X, Sami S, Hornberger M. Network-selective vulnerability of the human cerebellum to Alzheimer’s disease and frontotemporal dementia. *Brain* 2016;139:1527–38. doi:10.1093/brain/aww003.
  - [18] Eickhoff SB, Bzdok D, Laird AR, Kurth F, Fox PT. Activation likelihood estimation revisited. *Neuroimage* 2012;59:2349–61. doi:10.1016/j.neuroimage.2011.09.017.
  - [19] Diedrichsen J, Zotow E. Surface-based display of volume-averaged cerebellar imaging data. *PLoS One* 2015;10:1–18. doi:10.1371/journal.pone.0133402.
  - [20] King M, Hernandez-Castillo CR, Poldrack R, Ivry RB, Diedrichsen J. A Multi-Domain Task Battery Reveals Functional Boundaries in the Human Cerebellum. *BioRxiv* 2018:1–41. doi:http://dx.doi.org/10.1101/423509.
  - [21] Guell X, Schmahmann JD, Gabrieli JDE DE, Ghosh SS. Functional gradients of the cerebellum. *Elife* 2018;7:1–22. doi:10.7554/eLife.36652.
  - [22] Guell X, Goncalves M, Kaczmarzyk JR, Gabrieli JDEE, Schmahmann JD, Ghosh SS. LittleBrain $\square$ : a gradient-based tool for the topographical interpretation of cerebellar neuroimaging findings. *PLoS One* 2019;14:1–16. doi:10.1371/journal.pone.0210028.
  - [23] Eickhoff SB, Laird AR, Grefkes C, Wang LE, Zilles K, Fox PT. Coordinate-based activation likelihood estimation meta-analysis of neuroimaging data: A random-effects approach based on empirical estimates of spatial uncertainty. *Hum Brain Mapp* 2009;30:2907–26. doi:10.1002/hbm.20718.
  - [24] Turkeltaub PE, Eden GF, Jones KM, Zeffiro TA. Meta-analysis of the functional neuroanatomy of single-word reading: method and validation. *Neuroimage* 2002;16:765–80.
  - [25] Laird AR, Fox PM, Price CJ, Glahn DC, Uecker AM, Lancaster JL, et al. ALE meta-analysis: Controlling the false discovery rate and performing statistical contrasts. *Hum Brain Mapp* 2005;25:155–64. doi:10.1002/hbm.20136.
  - [26] Diedrichsen J, Balsters JH, Flavell J, Cussans E, Ramnani N. A probabilistic MR atlas of the human cerebellum. *Neuroimage* 2009;46:39–46. doi:10.1016/j.neuroimage.2009.01.045.
  - [27] Diedrichsen J, Maderwald S, Küper M, Thürling M, Rabe K, Gizewski ER, et al. Imaging the deep cerebellar nuclei: A probabilistic atlas and normalization procedure. *Neuroimage* 2011;54:1786–94. doi:10.1016/j.neuroimage.2010.10.035.
  - [28] Eickhoff SB, Bzdok D, Laird AR, Roski C, Caspers S, Zilles K, et al. Co-activation patterns distinguish cortical modules, their connectivity and functional differentiation. *Neuroimage* 2011;57:938–49. doi:10.1016/j.neuroimage.2011.05.021.
  - [29] Cohen J. *Statistical power analysis for the behavioral sciences*. 2nd ed. Hillsdale, N.J.: New York: Academic Press.; 1988.
  - [30] Möller C, Vrenken H, Jiskoot L, Versteeg A, Barkhof F, Scheltens P, et al. Different patterns of gray matter atrophy in early- and late-onset Alzheimer’s disease. *Neurobiol Aging* 2013;34:2014–22. doi:10.1016/j.neurobiolaging.2013.02.013.
  - [31] Becker N, Laukka EJ, Kalpouzos G, Naveh-Benjamin M, Bäckman L, Brehmer

- Y. Structural brain correlates of associative memory in older adults. *Neuroimage* 2015;118:146–53. doi:10.1016/j.neuroimage.2015.06.002.
- [32] Hafkemeijer A, Altmann-Schneider I, de Craen AJM, Slagboom PE, van der Grond J, Rombouts SARB. Associations between age and gray matter volume in anatomical brain networks in middle-aged to older adults. *Aging Cell* 2014;13:1068–74. doi:10.1111/acel.12271.
- [33] Ruscheweyh R, Deppe M, Lohmann H, Wersching H, Korsukewitz C, Duning T, et al. Executive performance is related to regional gray matter volume in healthy older individuals. *Hum Brain Mapp* 2013;34:3333–46. doi:10.1002/hbm.22146.
- [34] Zhang H, Sachdev PS, Wen W, Kochan NA, Crawford JD, Slavin MJ, et al. Grey Matter Correlates of Three Language Tests in Non-demented Older Adults. *PLoS One* 2013;8:e80215. doi:10.1371/journal.pone.0080215.
- [35] Bernard JA, Nguyen AD, Hausman HK, Maldonado T, Ballard HK, Eakin SM, et al. Shaky Scaffolding: Age Differences In Cerebellar Activation Revealed Through Activation Likelihood Estimation Meta-Analysis. *BioRxiv* 2019:716530. doi:10.1101/716530.
- [36] Hoxha E, Lippiello P, Zurlo F, Balbo I, Santamaria R, Tempia F, et al. The emerging role of altered cerebellar synaptic processing in Alzheimer’s disease. *Front Aging Neurosci* 2018;10:1–9. doi:10.3389/fnagi.2018.00396.
- [37] Oh H, Madison C, Villeneuve S, Markley C, Jagust WJ. Association of gray matter atrophy with age,  $\beta$ -amyloid, and cognition in aging. *Cereb Cortex* 2014;24:1609–18. doi:10.1093/cercor/bht017.
- [38] Jacobs HIL, Hopkins DA, Mayrhofer HC, Bruner E, Van Leeuwen FW, Raaijmakers W, et al. The cerebellum in Alzheimer’s disease: Evaluating its role in cognitive decline. *Brain* 2018;141:37–47. doi:10.1093/brain/awx194.
- [39] Greicius MD, Srivastava G, Reiss AL, Menon V, Raichle E, Greicius MD, et al. Default-Mode Network Activity Distinguishes Alzheimer’s Disease from Healthy Aging: Evidence from Functional MRI. *Proc Natl Acad Sci* 2004;101:4637–42.
- [40] Hafkemeijer A, Altmann-Schneider I, Oleksik AM, van de Wiel L, Middelkoop HAMM, van Buchem MA, et al. Increased functional connectivity and brain atrophy in elderly with subjective memory complaints. *Brain Connect* 2013;3:353–62. doi:10.1089/brain.2013.0144.
- [41] Bai F, Zhang Z, Watson DR, Yu H, Shi Y, Yuan Y, et al. Abnormal Functional Connectivity of Hippocampus During Episodic Memory Retrieval Processing Network in Amnesic Mild Cognitive Impairment. *Biol Psychiatry* 2009;65:951–8. doi:10.1016/j.biopsych.2008.10.017.
- [42] Matura S, Prvulovic D, Jurcoane A, Hartmann D, Miller J, Scheibe M, et al. Differential effects of the ApoE4 genotype on brain structure and function. *Neuroimage* 2014;89:81–91. doi:10.1016/j.neuroimage.2013.11.042.
- [43] Arnaiz E, Almkvist O. Neuropsychological features of mild cognitive impairment and preclinical Alzheimer’s disease. *Acta Neurol Scand* 2003;107:34–41. doi:10.1034/j.1600-0404.107.s179.7.x.
- [44] Hoche F, Guell X, Vangel MG, Sherman JC, Schmahmann JD. The cerebellar cognitive affective/Schmahmann syndrome scale. *Brain* 2018;141:248–70. doi:10.1093/brain/awx317.
- [45] Bernard JA, Seidler RD. Relationships between regional cerebellar volume and sensorimotor and cognitive function in young and older adults. *Cerebellum* 2013;12:721–37. doi:10.1007/s12311-013-0481-z.

- [46] Hulst T, van der Geest JN, Thürling M, Goericke S, Frens MA, Timmann D, et al. Ageing shows a pattern of cerebellar degeneration analogous, but not equal, to that in patients suffering from cerebellar degenerative disease. *Neuroimage* 2015;116:196–206. doi:10.1016/j.neuroimage.2015.03.084.
- [47] Halko MA, Farzan F, Eldaief MC, Schmammann JD, Pascual-Leone A. Intermittent Theta-Burst Stimulation of the Lateral Cerebellum Increases Functional Connectivity of the Default Network. *J Neurosci* 2014;34:12049–56. doi:10.1523/JNEUROSCI.1776-14.2014.
- [48] D’Mello AM, Turkeltaub PE, Stoodley CJ. Cerebellar tDCS Modulates Neural Circuits during Semantic Prediction: A Combined tDCS-fMRI Study. *J Neurosci* 2017;37:1604–13. doi:10.1523/jneurosci.2818-16.2017.

**Acknowledgements:** NA.

**Declaration of interest:** none.

**Funding Sources:** This research did not receive any specific grant from funding agencies in the public, commercial, or not-for-profit sectors.

**Keywords:** aging, Alzheimer's disease, cerebellum, neuroimaging, grey matter

Table 1. Details of the systematic literature search.

| <b>Date</b>         | <b>Database</b> | <b>Search Terms and Restrictions</b>                                                                                                                                                                                                                                     | <b>N identified studies</b> |
|---------------------|-----------------|--------------------------------------------------------------------------------------------------------------------------------------------------------------------------------------------------------------------------------------------------------------------------|-----------------------------|
| <b>Searched</b>     |                 |                                                                                                                                                                                                                                                                          |                             |
| October 1st<br>2019 | Pubmed          | ( <i>ag*ing</i> OR <i>elderly</i> OR <i>older adults</i> OR<br><i>age-related</i> ) AND ( <i>voxel-based</i><br><i>morphometry</i> OR <i>VBM</i> OR <i>grey matter</i><br>OR <i>gray matter</i> ) in <b>Title/Abstract</b> ; filter:<br>human                            | 1766                        |
|                     | PsycInfo        | ( <i>ag*ing</i> OR <i>elderly</i> OR <i>older adults</i> OR<br><i>age-related</i> ) AND ( <i>voxel-based</i><br><i>morphometry</i> OR <i>VBM</i> OR <i>grey matter</i><br>OR <i>gray matter</i> ) in <b>Abstract</b> (filter:<br>human, peer-reviewed journals, English) | 1078                        |
| Unique records      |                 |                                                                                                                                                                                                                                                                          | 2031                        |

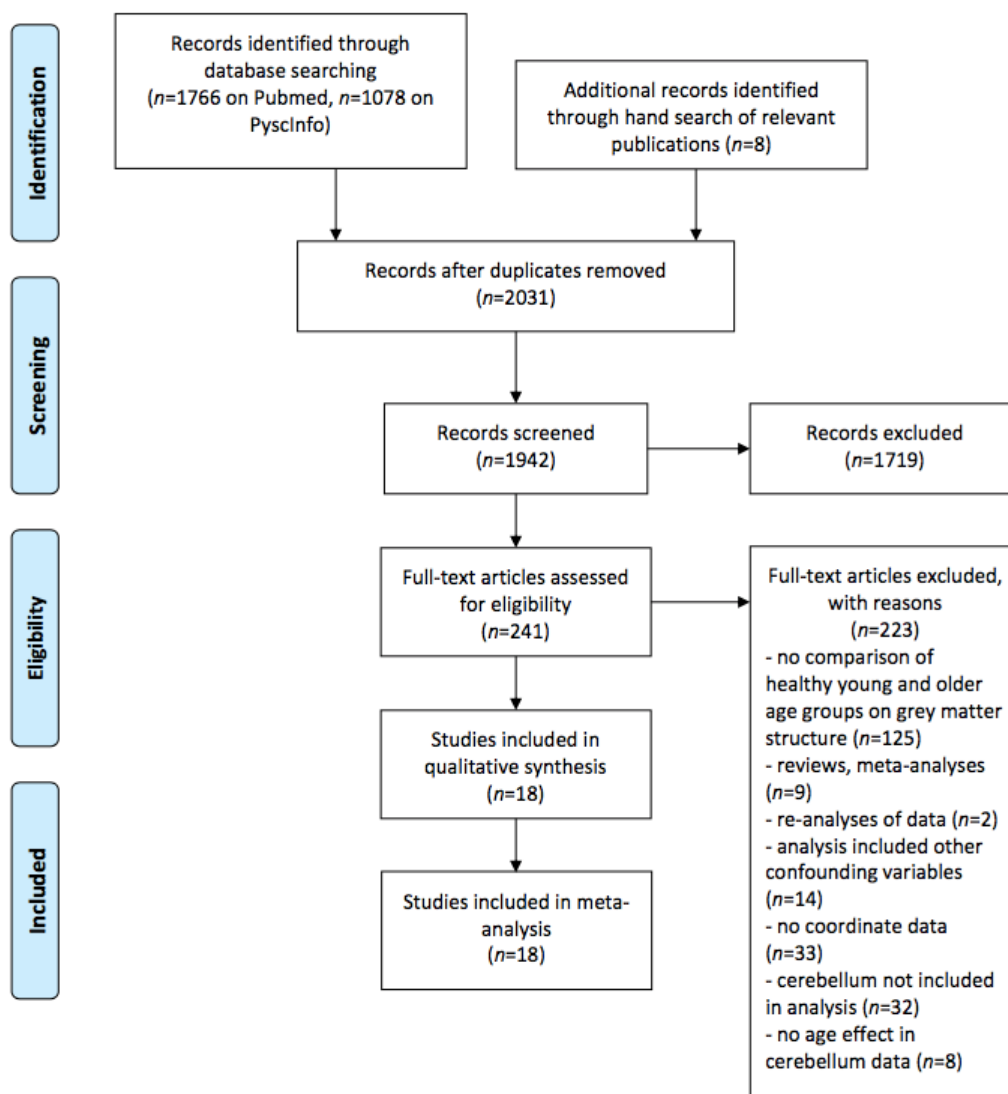

Figure 1. PRISMA flowchart of the study selection procedure.

Table 2. Results of the anatomical likelihood estimation meta-analyses for healthy ageing ( $n=18$  experiments with a total of 2441 subjects and  $k=64$  foci of cerebellar grey matter decline), Alzheimer's disease ( $n=13$  experiments with a total of 528 subjects and  $k=34$  foci of cerebellar decline), and the conjunction which identified the spatial overlap between effects of Alzheimer's disease and age on cerebellar structure. Here we report the Montreal Neurological Institute coordinates returned by GingerALE. Labels are according to the spatially unbiased atlas template of the cerebellum and brainstem (SUIT)[26].



| Cluster number                                    | Peak MNI coordinates | Extent                        | Cluster size (mm <sup>3</sup> ) | p-value                      | Local extrema                                        | Peak Label                                      | Notes                     |
|---------------------------------------------------|----------------------|-------------------------------|---------------------------------|------------------------------|------------------------------------------------------|-------------------------------------------------|---------------------------|
| <i>Healthy ageing</i>                             |                      |                               |                                 |                              |                                                      |                                                 |                           |
| 1                                                 | 33 -81 -37           | 24 -90 -42 to<br>40 -72 -30   | 1504                            | .018<br>.015                 | 36 -80 -38<br>30 -88 -34                             | R Crus II                                       |                           |
| 2                                                 | 35 -63 -29           | 28 -70 -34 to<br>42 -56 -22   | 1464                            | .018                         | 36 -60 -30                                           | R Crus I                                        | Extends into<br>VI        |
| 3                                                 | -35 -77 -40          | -46 -86 -44 to<br>-28 -68 -34 | 1288                            | .018<br>.016<br>.011         | -34 -82 -38<br>-34 -72 -40<br>-42 -76 -40            | L Crus II                                       |                           |
| 4                                                 | 1 -72 -15            | -10 -78,-22 to<br>8,-66,-10   | 1112                            | .015<br>.012                 | 4 -74 -14<br>-8 -70 -14                              | Vermal lobule VI<br>L lobule VI                 |                           |
| 5                                                 | -40 -42 -41          | -48 -54 -46 to<br>-34 -36 -36 | 808                             | .019<br>.011<br>.011         | -38 -40 -40<br>-46 -48 -42<br>-46 -52 -44            | L Crus II<br>L Crus I<br>L Crus II              | Extends into<br>VIIb/VIII |
| <i>Alzheimer's disease</i>                        |                      |                               |                                 |                              |                                                      |                                                 |                           |
| 1                                                 | 33 -67 -29           | 26 -78 -40 to<br>44 -58 -20   | 2056                            | .015<br>.014<br>.012<br>.012 | 40 -62 -24<br>30 -68 -38<br>30 -76 -26<br>28 -72 -28 | R Crus I<br>R Crus I<br>R lobule VI<br>R Crus I | Extends into<br>Crus II   |
| <i>Conjunction of age and Alzheimer's disease</i> |                      |                               |                                 |                              |                                                      |                                                 |                           |
| 1                                                 | 36 -62 -27           | 30 -66 -32 to<br>40 -58 -22   | 408                             | .013                         | 36 -62 -26                                           | R lobule VI                                     | Extends into<br>Crus I    |
| 2                                                 | 32 -72 -38           |                               | 8                               | .008                         |                                                      | Crus II                                         |                           |
| 3                                                 | 30 -68 -30           |                               | 8                               | .008                         |                                                      | Crus I                                          |                           |

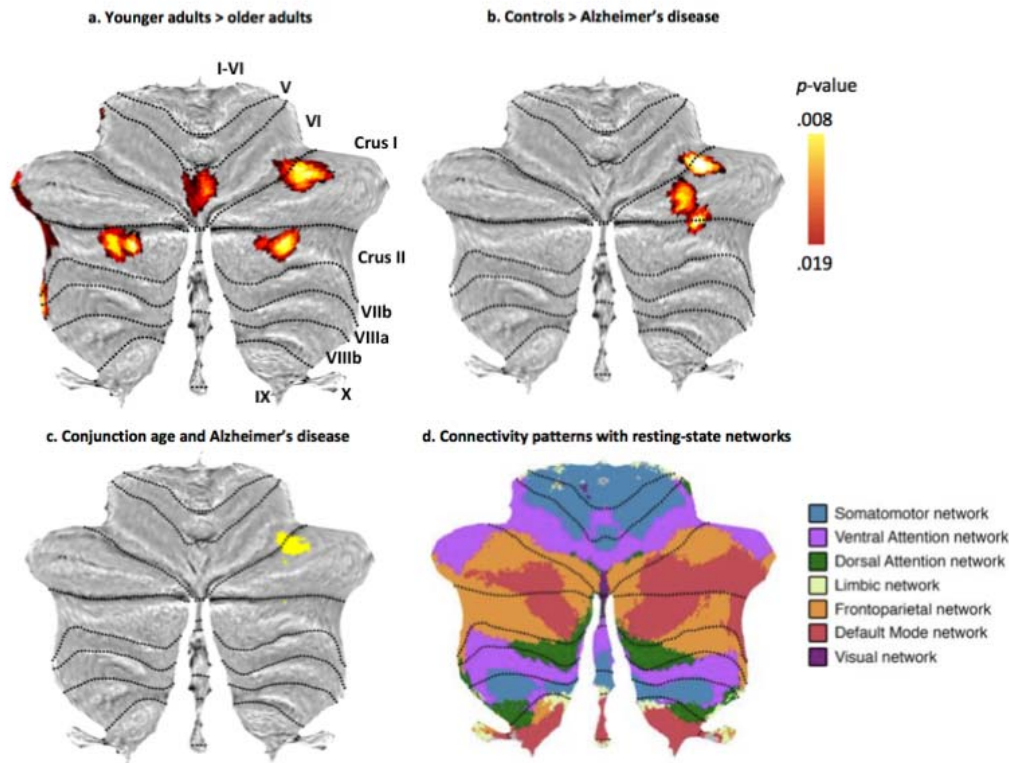

Figure 2. a. Cerebellar grey matter loss in across 18 healthy ageing studies. b. Cerebellar grey matter reductions in Alzheimer's disease across 13 studies. c. Conjunction of effects of healthy ageing and Alzheimer's disease on grey matter volume. Note that these results are based on the voxelwise minimum value from the two input analyses on ageing and AD. d. Cerebro-cerebellar resting-state networks as revealed in Buckner et al. [13]. All clusters are shown at  $p < .05$  (FDR-corrected).

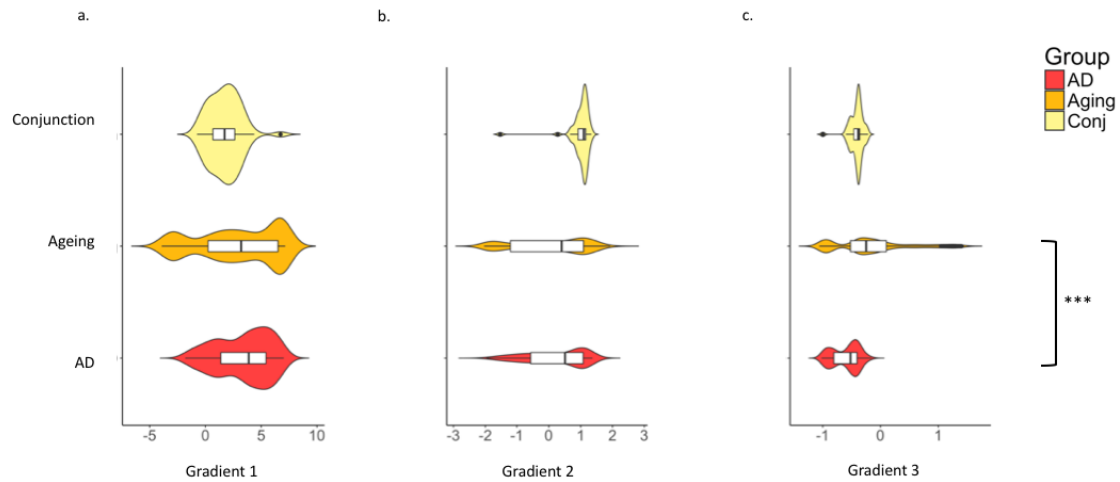

Figure 3. Violin plots showing the distribution of gradient values by analysis group.

Permutations testing for differences in the rank sum of gradient values between healthy ageing and AD found no difference in Gradients 1 (a) and 2 (b) values. A significant difference in mean values was found for Gradient 3 (c) values.

\*\*\*  $p < .001$

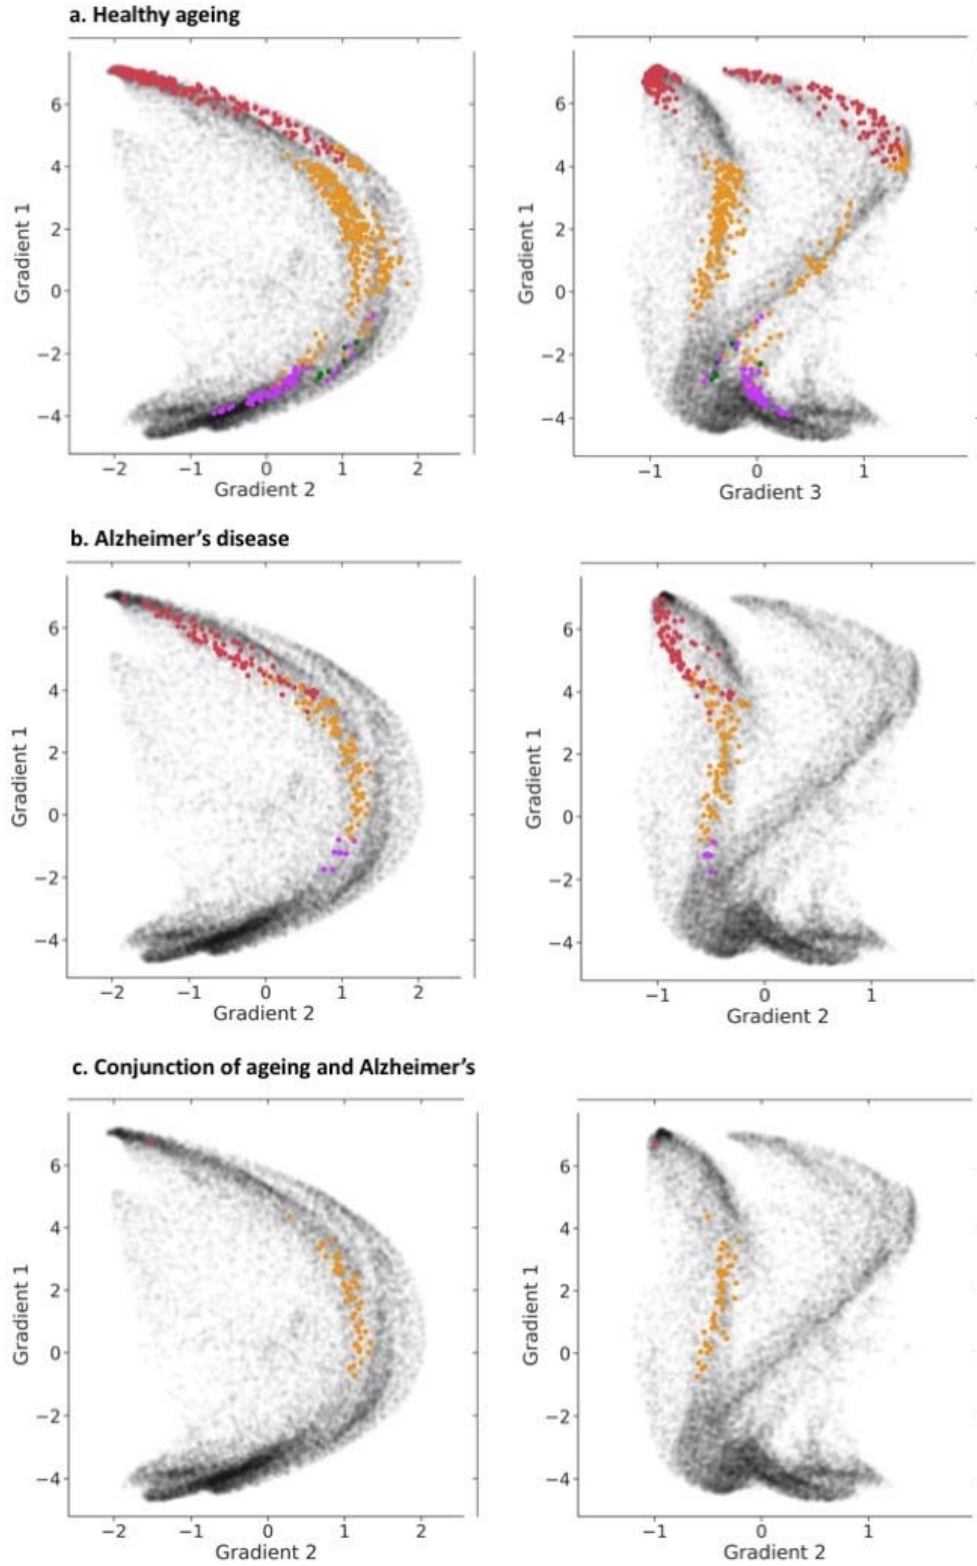

d. Connectivity patterns with brain networks

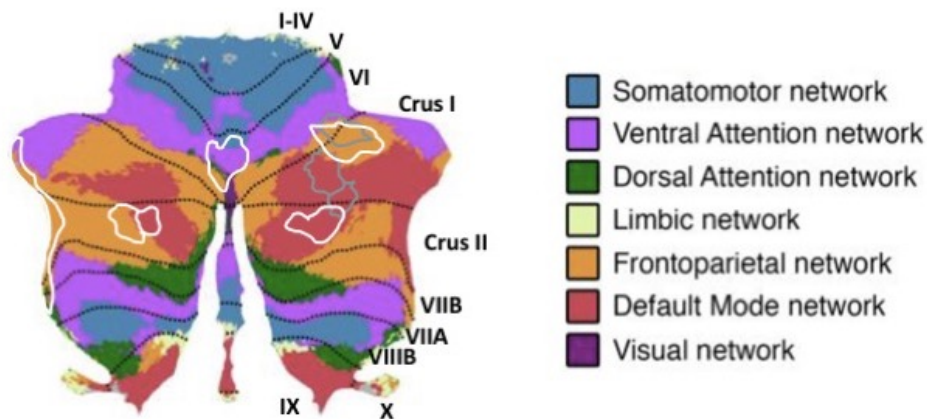

e. Gradient 1 tracks progression from motor (blue) to cognitive (red) processing.

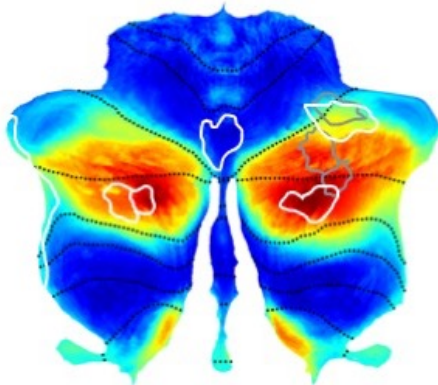

f. Gradient 2 tracks progression from task-unfocused (blue) to task-focused (red) processing.

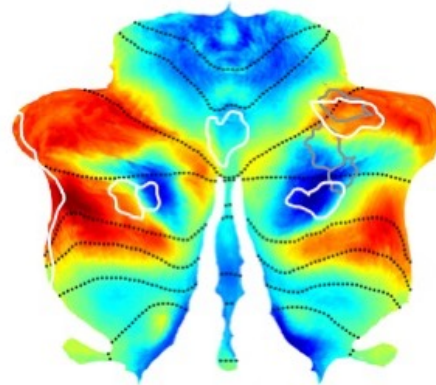

g. Gradient 3 highlights hemispheric differences in processing between left (blue) and right (red) homotopic cognitive regions.

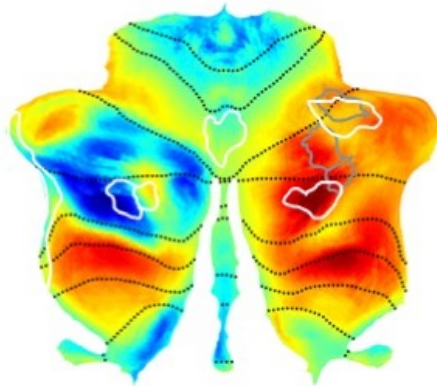

Legend for Gradient 3:

- Affected by healthy ageing
- Affected by Alzheimer's disease
- Low  $\leftarrow$   $\rightarrow$  High gradient values

Figure 4. The distribution of the voxels of age-related grey matter loss according to the three main functional gradients of the cerebellum for a. healthy ageing, b. Alzheimer's disease and c. the conjunction of ageing and AD. Colour codes represent the functional resting-state networks identified in Buckner et al. [13] which are shown on a cerebellar flatmap in d. e. Gradient 1 represents the transition from motor tasks (lower values) to task-unfocused cognitive processing such as in the default mode network (higher values). f. Gradient 2 isolates attentional processing moving from task-unfocused (low values) to task-focused (high values) processes. g. Gradient 3 shows differences in lateralisation of non-motor processes [21,22]. The regions identified in our meta-analysis at a statistically significant threshold of  $p < .05$  (FDR-corrected) are plotted on top of each flatmap for healthy ageing (white outline) and Alzheimer's disease (grey outline).
